# Supplementary material
Source: PubMed Central journal article supplement (PMC528766)
Supplement: pnas_101_45_15974__5.pdf [file pnas_101_45_15974__5.pdf]

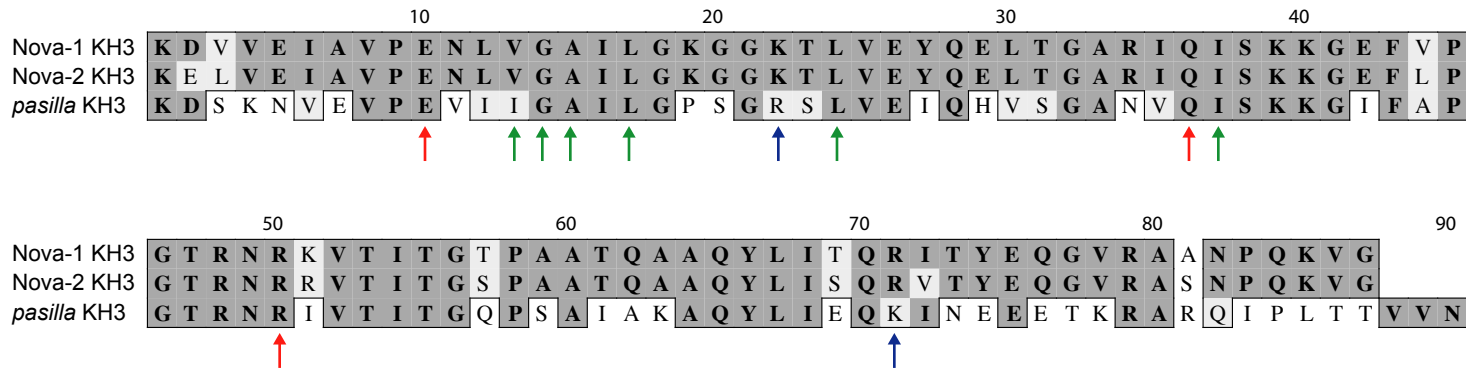

- ↑ = Residues that interact with YCAY via hydrogen bonds
- ↑ = Residues that interact with YCAY via van der Waals contacts
- ↑ = Residues that interact with YCAY via water bridges
