# Supplementary material
Source: PubMed Central journal article supplement (PMC528766)
Supplement: pnas_101_45_15974__6.pdf [file pnas_101_45_15974__6.pdf]

|                         |      |   |     |   |     |   |     |   |   |   |   |   |   |   |   |   |   |   |   |   |   |   |   |   |   |   |   |   |   |   |   |   |   |   |   |   |   |   |   |
|-------------------------|------|---|-----|---|-----|---|-----|---|---|---|---|---|---|---|---|---|---|---|---|---|---|---|---|---|---|---|---|---|---|---|---|---|---|---|---|---|---|---|---|
|                         | -100 |   | -90 |   | -80 |   | -70 |   |   |   |   |   |   |   |   |   |   |   |   |   |   |   |   |   |   |   |   |   |   |   |   |   |   |   |   |   |   |   |   |
| <i>D. melanogaster</i>  | C    | G | A   | T | T   | C | C   | G | C | T | A | G | T | T | G | C | A | C | A | G | A | A | A | T | C | C | C | T | G | C | A | T | T | C |   |   |   |   |   |
| <i>D. yakuba</i>        | C    | A | A   | T | T   | C | C   | T | C | T | A | G | T | T | T | C | A | C | A | G | A | C | A | A | T | C | C | C | T | T | C | A | T | T | C |   |   |   |   |
| <i>D. pseudoobscura</i> | C    | T | G   | T | C   | A | T   | A | C | C | A | T | T | T | C | C | A | T | T | T | C | C | A | T | T | C | C | A | T | T | C | A | C | A | C | A | T | C | A |
| <i>D. virilis</i>       | A    | A | A   | A | T   | C | G   | C | A | T | G | G | C | C | A | C | A | G | C | A | A | C | A | A | T | A | A | G | A | A | A | A | T | T | C |   |   |   |   |

|                         |   |     |   |     |   |     |   |   |   |   |   |   |   |   |   |   |   |   |   |   |   |   |   |   |   |   |   |   |   |   |   |   |   |   |   |
|-------------------------|---|-----|---|-----|---|-----|---|---|---|---|---|---|---|---|---|---|---|---|---|---|---|---|---|---|---|---|---|---|---|---|---|---|---|---|---|
|                         |   | -60 |   | -50 |   | -40 |   |   |   |   |   |   |   |   |   |   |   |   |   |   |   |   |   |   |   |   |   |   |   |   |   |   |   |   |   |
| <i>D. melanogaster</i>  | C | A   | T | C   | A | T   | - | T | C | A | T | T | C | A | T | T | C | C | T | T | A | T | T | T | T | A | - | - | A | T | C | T | G | A | A |
| <i>D. yakuba</i>        | C | A   | T | A   | A | A   | - | T | C | A | T | T | C | A | T | T | C | C | T | T | A | T | T | T | A | A | - | - | A | T | C | T | G | A | A |
| <i>D. pseudoobscura</i> | C | -   | T | C   | - | -   | - | T | C | A | T | C | C | T | T | T | A | T | T | A | T | G | T | A | T | - | - | A | C | C | G | A | A | C |   |
| <i>D. virilis</i>       | C | A   | T | C   | A | T   | T | C | C | A | T | T | C | A | C | G | A | T | C | T | A | T | T | T | T | C | C | C | A | T | C | T | T | A | C |

|                         |   |     |   |     |   |     |   |   |   |   |   |   |   |   |   |   |   |   |   |   |   |   |   |   |   |   |   |   |   |   |   |   |   |   |   |
|-------------------------|---|-----|---|-----|---|-----|---|---|---|---|---|---|---|---|---|---|---|---|---|---|---|---|---|---|---|---|---|---|---|---|---|---|---|---|---|
|                         |   | -30 |   | -20 |   | -10 |   |   |   |   |   |   |   |   |   |   |   |   |   |   |   |   |   |   |   |   |   |   |   |   |   |   |   |   |   |
| <i>D. melanogaster</i>  | T | C   | - | -   | T | C   | A | C | C | A | C | T | A | T | T | A | T | C | G | T | T | T | C | T | C | C | T | A | C | C | T | G | T | T | T |
| <i>D. yakuba</i>        | A | C   | - | -   | T | C   | A | C | C | A | C | T | A | T | - | A | T | C | G | T | T | T | C | T | C | C | T | T | A | C | T | G | T | T | T |
| <i>D. pseudoobscura</i> | A | T   | - | -   | C | C   | A | A | C | T | T | A | T | T | T | T | C | A | T | T | T | C | T | T | C | T | A | T | A | T | G | T | T | T |   |
| <i>D. virilis</i>       | T | T   | T | A   | T | A   | A | A | G | A | T | T | A | T | T | T | T | G | T | T | T | C | T | T | C | T | A | T | A | C | G | T | T | T |   |

|                         |   |     |   |     |   |     |   |   |   |   |   |   |   |   |   |   |   |   |   |   |   |   |   |   |   |   |   |   |   |   |   |   |   |   |
|-------------------------|---|-----|---|-----|---|-----|---|---|---|---|---|---|---|---|---|---|---|---|---|---|---|---|---|---|---|---|---|---|---|---|---|---|---|---|
|                         |   | +10 |   | +20 |   | +30 |   |   |   |   |   |   |   |   |   |   |   |   |   |   |   |   |   |   |   |   |   |   |   |   |   |   |   |   |
| <i>D. melanogaster</i>  | A | G   | T | C   | G | T   | T | T | C | C | A | A | C | A | C | T | A | C | G | A | A | G | A | A | G | A | T | A | T | A | C | A | C | A |
| <i>D. yakuba</i>        | A | G   | T | C   | G | T   | T | T | C | C | A | A | C | A | C | T | A | C | G | A | A | G | A | A | G | A | T | A | T | A | C | A | C | A |
| <i>D. pseudoobscura</i> | A | G   | T | C   | G | T   | T | T | C | G | C | A | A | C | A | C | T | A | C | G | A | A | G | G | A | T | A | T | A | C | A | C | A |   |
| <i>D. virilis</i>       | A | G   | T | C   | G | T   | T | T | C | G | C | A | A | C | A | C | T | A | T | G | A | A | G | G | A | T | A | T | A | C | A | C | A |   |
