# Supplementary material
Source: PubMed Central journal article supplement (PMC528766)
Supplement: pnas_101_45_15974__8.pdf [file pnas_101_45_15974__8.pdf]

Table 1. Genes Containing DExH/D-box Motifs in InterPro Database

| CG Number | Gene Name        | Best <i>S. cerevisiae</i> | Match Score | Best <i>C. elegans</i>      | Match Score | Best <i>H. sapiens</i>          | Match | Score  | Comments                                                                                       |
|-----------|------------------|---------------------------|-------------|-----------------------------|-------------|---------------------------------|-------|--------|------------------------------------------------------------------------------------------------|
| CG10077   | <i>CG10077</i>   | YNL112W ( <i>DBP2</i> )   | 4.1e-143    | F58E10.3                    | 2.3e-141    | NP_004387.1 ( <i>DDX5</i> )     |       | 1e-177 | ---                                                                                            |
| CG10210   | <i>tst</i>       | YLR398C ( <i>SKI2</i> )   | 2.8e-180    | F01G4.3                     | 3.2e-189    | NP_008860.3 ( <i>SKIV2L</i> )   |       | 0.0    | Involved in cytoplasmic 3'-5' mRNA decay                                                       |
| CG10279   | <i>Rm62</i>      | YNL112W ( <i>DBP2</i> )   | 1.5e-138    | F58E10.3                    | 5.5e-133    | NP_006377.2 ( <i>DDX17</i> )    |       | 1e-169 | Modulates U1 snRNP binding                                                                     |
| CG10333   | <i>CG10333</i>   | YNL112W ( <i>DBP2</i> )   | 2.8e-81     | F01F1.7                     | 5.5e-227    | NP_004809.2 ( <i>DDX23</i> )    |       | 0.0    | Prp28 homolog, U5-100K homolog                                                                 |
| CG10445   | <i>CG10445</i>   | YLR032W ( <i>RAD5</i> )   | 5.3e-51     | T23H2.3b                    | 7.6e-71     | NP_003585.3 ( <i>TTF2</i> )     |       | 5e-76  | Involved in RNA polymerase II transcription termination                                        |
| CG10689   | <i>CG10689</i>   | YER013W ( <i>PRP22</i> )  | 0.0         | C04H5.6 ( <i>mog-4</i> )    | 1.3e-303    | NP_003578.1 ( <i>DHX16</i> )    |       | 0.0    | Prp22 homolog                                                                                  |
| CG10777   | <i>CG10777</i>   | YNL112W ( <i>DBP2</i> )   | 7.8e-133    | F58E10.3                    | 3.7e-130    | NP_006377.2 ( <i>DDX17</i> )    |       | 1e-162 | ---                                                                                            |
| CG11107   | <i>CG11107</i>   | YGL120C ( <i>PRP43</i> )  | 4.7e-229    | F56D2.6a                    | 1.6e-275    | NP_001349.1 ( <i>DHX15</i> )    |       | 0.0    | Prp43 Homolog                                                                                  |
| CG11403   | <i>CG11403</i>   | TPL008W ( <i>CHL1</i> )   | 3.8e-88     | M03C11.2                    | 4.6e-104    | NP_085911.1 ( <i>DDX11</i> )    |       | 1e-153 | <i>S. cerevisiae</i> CHL1-like helicase homolog                                                |
| CG12759   | <i>Dbp45A</i>    | YHR169W ( <i>DBP8</i> )   | 8.9e-77     | H20J04.4                    | 5e-75       | NP_061943.2 ( <i>DDX49</i> )    |       | 1e-117 | ---                                                                                            |
| CG14443   | <i>CG14443</i>   | YNL112W ( <i>DBP2</i> )   | 6e-55       | F58E10.3                    | 1.4e-45     | NP_004387.1 ( <i>DDX5</i> )     |       | 4e-60  | ---                                                                                            |
| CG14637   | <i>abs</i>       | YNL112W ( <i>DBP2</i> )   | 7.2e-75     | H27M09.1                    | 4.7e-166    | NP_057306.2 ( <i>DDX41</i> )    |       | 0.0    | Helicase required for axon guidance                                                            |
| CG1582    | <i>CG1582</i>    | YLR419W                   | 1.3e-103    | F52B5.3                     | 1.7e-85     | NP_945314.1 ( <i>DHX57</i> )    |       | 0.0    | ---                                                                                            |
| CG1666    | <i>Hlc</i>       | YLR276C ( <i>DBP9</i> )   | 2.5e-100    | C24H12.4a                   | 3e-93       | NP_061955.1 ( <i>DDX56</i> )    |       | 1e-134 | ---                                                                                            |
| CG31212   | <i>CG31212</i>   | YGL150C ( <i>INO80</i> )  | 3.3e-202    | Y111B2A.23                  | 4e-114      | NP_115572.2                     |       | 0.0    | KIAA1259: hypothetical protein KIAA1259                                                        |
| CG3158    | <i>spn-E</i>     | YLR419W                   | 3.6e-51     | T07D4.3 ( <i>rha-1</i> )    | 6.4e-65     | XP_058619.5 ( <i>C14orf75</i> ) |       | 1e-172 | ---                                                                                            |
| CG3225    | <i>CG3225</i>    | YER013W ( <i>PRP22</i> )  | 8.6e-127    | Y67D2.6                     | 6e-143      | NP_068750.2 ( <i>DHX35</i> )    |       | 0.0    | Prp22 Homolog, required for second step and release of mRNA from spliceosome                   |
| CG32344   | <i>CG32344</i>   | YDL031W ( <i>DBP10</i> )  | 3.9e-115    | Y94H6A.5a                   | 1.3e-138    | NP_076977.2 ( <i>DDX54</i> )    |       | 1e-168 | ---                                                                                            |
| CG32533   | <i>CG32533</i>   | YNR011C ( <i>PRP2</i> )   | 7.1e-82     | Y37E11AM.1                  | 7.7e-166    | NP_055496.2 ( <i>DHX34</i> )    |       | 0.0    | Prp2 Homolog, required for first step of splicing                                              |
| CG32604   | <i>I(1)G0007</i> | YKR086W ( <i>PRP16</i> )  | 6.7e-207    | K03H1.2 ( <i>mog-1</i> )    | 0.0         | NP_054722.2 ( <i>DHX38</i> )    |       | 0.0    | PRP16, required for second step of splicing                                                    |
| CG3506    | <i>vas</i>       | YOR204W ( <i>DED1</i> )   | 8.9e-109    | Y54E10A.9a ( <i>vbh-1</i> ) | 3e-109      | NP_061912.1 ( <i>DDX4</i> )     |       | 1e-135 | ---                                                                                            |
| CG3561    | <i>CG3561</i>    | YPL119C ( <i>DBP1</i> )   | 2e-26       | T21G5.3 ( <i>glh-1</i> )    | 1.2e-28     | NP_060850.1 ( <i>DDX28</i> )    |       | 4e-69  | ---                                                                                            |
| CG3696    | <i>kis</i>       | YER164W ( <i>CHD1</i> )   | 1.9e-137    | T04D1.4                     | 0.0         | XP_098762.6                     |       | 0.0    | ---                                                                                            |
| CG3733    | <i>Chd1</i>      | YER164W ( <i>CHD1</i> )   | 4.1e-186    | H06O01.2                    | 4.4e-286    | NP_001262.1 ( <i>CHD2</i> )     |       | 0.0    | chromodomain helicase DNA binding protein 2                                                    |
| CG3753    | <i>CG3753</i>    | YFR038W                   | 1.1e-32     | C16A3.1a                    | 4.6e-97     | NP_054859.2 ( <i>SMARCAL1</i> ) |       | 1e-103 | SWI/SNF related, matrix associated, actin dependent regulator of chromatin, subfamily a-like 1 |
| CG4049    | <i>CG4049</i>    | YGL163C ( <i>RAD54</i> )  | 1.2e39      | C27B7.4                     | 6.4e-118    | NP_055921.1                     |       | 1e-149 | SRISNF2L: KIAA0809 protein                                                                     |

| CG Number | Gene Name     | Best <i>S. cerevisiae</i> Match Score | Best <i>C. elegans</i> Match Score | Best <i>H. sapiens</i> Match Score | Score    | Comments                        |        |                                                                                                                                                        |
|-----------|---------------|---------------------------------------|------------------------------------|------------------------------------|----------|---------------------------------|--------|--------------------------------------------------------------------------------------------------------------------------------------------------------|
| CG4078    | CG4078        | YER171W ( <i>RAD3</i> )               | 7.2e-62                            | F25H2.13                           | 2.5e-104 | NP_057518.1 ( <i>C20orf41</i> ) | 1e-180 | ---                                                                                                                                                    |
| CG4261    | <i>Hel89B</i> | YPL082C ( <i>MOT1</i> )               | 3.6e-251                           | F15D4.1 ( <i>btf-1</i> )           | 6.4e-86  | NP_003963.1 ( <i>BTAF1</i> )    | 0.0    | BTAF1 RNA polymerase II, B-TFIID transcription factor-associated, TAFII170                                                                             |
| CG4548    | <i>XNP</i>    | YGL163C ( <i>RAD54</i> )              | 7.5e-58                            | B0041.7 ( <i>xnp-1</i> )           | 1.6e-145 | NP_000480.2 ( <i>ATRX</i> )     | 0.0    | RAD54 homolog, alpha thalassemia/mental retardation syndrome X-linked                                                                                  |
| CG4792    | <i>Dcr-1</i>  | YMR239C ( <i>RNT1</i> )               | 0.00038                            | K12H4.8 ( <i>dcr-1</i> )           | 3e-206   | NP_085124.2 ( <i>DICER1</i> )   | 1e-118 | Dicer1, Involved in RNAi, cleaves dsRNA                                                                                                                |
| CG4901    | CG4901        | YER013W ( <i>PRP22</i> )              | 1.5e-99                            | K03H1.2 ( <i>mog-1</i> )           | 8.8e-110 | NP_064547.2 ( <i>DHX33</i> )    | 1e-146 | Related to Prp22                                                                                                                                       |
| CG4916    | <i>me31B</i>  | YDL160C ( <i>DHH1</i> )               | 3.1e-154                           | C07H6.5 ( <i>cgh-1</i> )           | 1.6e-172 | NP_004388.1 ( <i>DDX6</i> )     | 1e-177 | ---                                                                                                                                                    |
| CG5205    | CG5205        | YGR271W ( <i>SLH1</i> )               | 0.0                                | Y46G5A.4                           | 0.0      | NP_006819.1 ( <i>HELIC1</i> )   | 0.0    | helicase, ATP binding 1                                                                                                                                |
| CG5589    | CG5589        | YGL171W ( <i>ROK1</i> )               | 9.7e-87                            | R05D11.4                           | 1.1e-77  | NP_008941.2 ( <i>DDX52</i> )    | 1e-138 | ---                                                                                                                                                    |
| CG5800    | CG5800        | YJL033W ( <i>HCA4</i> )               | 6.4e121                            | Y23H5B.6                           | 1.3e-115 | NP_004389.2 ( <i>DDX10</i> )    | 1e-178 | ---                                                                                                                                                    |
| CG5899    | CG5899        | YOR290C ( <i>SNF2</i> )               | 1.3e-79                            | M03C11.8                           | 3.3e-129 | NP_064544.1 ( <i>SMARCAD1</i> ) | 1e-161 | SWI/SNF-related, matrix-associated actin-dependent regulator of chromatin, subfamily a, containing DEAD/H box 1                                        |
| CG5931    | CG5931        | YER172C ( <i>BRR2</i> )               | 0.0                                | Y46G5A.4                           | 0.0      | NP_054733.2 ( <i>U5-200K</i> )  | 0.0    | Brr2/U5 snRNP-specific protein, 200-KD homolog, promotes conformational changes in the spliceosome required for the first step of splicing             |
| CG6227    | CG6227        | YBR237W ( <i>PRP5</i> )               | 5.4e-103                           | F53H1.1a                           | 2.8e-199 | NP_055644.2 ( <i>DDX46</i> )    | 0.0    | Prp5-like DEAD-box protein                                                                                                                             |
| CG6375    | <i>pit</i>    | YMR290C ( <i>HAS1</i> )               | 4.9e-156                           | B0511.6                            | 1.1e-166 | NP_006764.3 ( <i>DDX18</i> )    | 0.0    | ---                                                                                                                                                    |
| CG6418    | CG6418        | YNL112W ( <i>DBP2</i> )               | 6.8e-95                            | C46F11.4                           | 9.2e-171 | NP_031398.2 ( <i>DDX42</i> )    | 0.0    | SF3b125 homolog                                                                                                                                        |
| CG6539    | <i>Dhh1</i>   | YDL160C ( <i>DHH1</i> )               | 4.2e-58                            | C07H6.5 ( <i>cgh-1</i> )           | 7.5e-58  | NP_009135.3 ( <i>DDX20</i> )    | 7e-68  | ---                                                                                                                                                    |
| CG6920    | <i>mus309</i> | YMR190C ( <i>SGS1</i> )               | 1.5e-124                           | T04A11.6 ( <i>him-6</i> )          | 3.3e-126 | NP_000048.1 ( <i>BLM</i> )      | 1e-162 | Bloom syndrome                                                                                                                                         |
| CG7269    | <i>Hel25E</i> | YDL084W ( <i>SUB2</i> )               | 2.3e-133                           | C26D10.2a ( <i>hel-1</i> )         | 3.8e-164 | NP_004631.1 ( <i>BAT1</i> )     | 0.0    | HLA-B associated transcript 1                                                                                                                          |
| CG7483    | CG7483        | YDR021W ( <i>FAL1</i> )               | 1.4e-133                           | F33D11.10                          | 3e-187   | NP_055555.1 ( <i>DDX48</i> )    | 0.0    | ---                                                                                                                                                    |
| CG7487    | <i>RecQ4</i>  | YMR190C ( <i>SGS1</i> )               | 2e-42                              | T04A11.6 ( <i>him-6</i> )          | 3.9e-40  | NP_004251.1 ( <i>RECQL4</i> )   | 1e-169 | RecQ protein-like 4                                                                                                                                    |
| CG7878    | CG7878        | YNL112W ( <i>DBP2</i> )               | 5.1e-97                            | Y54G11A.3                          | 1.4e-102 | NP_061135.1 ( <i>DDX43</i> )    | 1e-159 | ---                                                                                                                                                    |
| CG7922    | CG7922        | YIR002C ( <i>MPH1</i> )               | 7.4e-72                            | F15B10.2 ( <i>drh-1</i> )          | 1.9e-14  | XP_048128.5                     | 1e-81  | KIAA1596                                                                                                                                               |
| CG7972    | CG7972        | YER172C ( <i>BRR2</i> )               | 2.2e-15                            | Y55B1AL.3                          | 6e-116   | NP_598375.1 ( <i>HEL308</i> )   | 0.0    | DNA helicase HEL308                                                                                                                                    |
| CG8019    | <i>hay</i>    | YIL143C ( <i>SSL2</i> )               | 2e-206                             | Y66D12A.15                         | 2e-247   | NP_000113.1 ( <i>ERCC3</i> )    | 0.0    | excision repair cross-complementing rodent repair deficiency, complementation group 3 (xeroderma pigmentosum group B complementing), TFIIH, RAD25, XPB |

| CG Number | Gene Name     | Best <i>S. cerevisiae</i> Match Score | Best <i>C. elegans</i> Match Score | Best <i>H. sapiens</i> Match Score | Score    | Comments                       |        |                                                                                                    |
|-----------|---------------|---------------------------------------|------------------------------------|------------------------------------|----------|--------------------------------|--------|----------------------------------------------------------------------------------------------------|
| CG8103    | <i>Mi-2</i>   | YER164W ( <i>CHD1</i> )               | 2.3e-137                           | F26F12.7 ( <i>let-418</i> )        | 0.0      | NP_001264.1 ( <i>CHD4</i> )    | 0.0    | chromodomain helicase DNA binding protein 4                                                        |
| CG8241    | <i>CG8241</i> | YER013W ( <i>PRP22</i> )              | 1.2e-239                           | EEED8.5 ( <i>mog-5</i> )           | 0.0      | NP_004932.1 ( <i>DHX8</i> )    | 0.0    | Prp22 Homolog                                                                                      |
| CG8611    | <i>CG8611</i> | YKR024C ( <i>DBP7</i> )               | 1.3e-67                            | B0511.6                            | 4.5e-55  | NP_073616.6 ( <i>DDX31</i> )   | 1e-118 | ---                                                                                                |
| CG8625    | <i>Iswi</i>   | YOR304W ( <i>ISW2</i> )               | 1.2e-241                           | F37A4.8 ( <i>isw-1</i> )           | 0.0      | NP_003592.2 ( <i>SMARCA5</i> ) | 0.0    | SWI/SNF related, matrix associated, actin dependent regulator of chromatin, subfamily a, member 5  |
| CG8915    | <i>CG8915</i> | YLR419W                               | 5.6e-80                            | F52B5.3                            | 3.1e-96  | NP_065916.1 ( <i>DHX36</i> )   | 1e-100 | ---                                                                                                |
| CG9054    | <i>Ddx1</i>   | YHR065C ( <i>RRP3</i> )               | 1.4e-39                            | Y55F3BR.1                          | 2.3e-173 | NP_004930.1 ( <i>DDX1</i> )    | 0.0    | ---                                                                                                |
| CG9075    | <i>eIF-4a</i> | YJL138C ( <i>TIF2</i> )               | 2.2e-128                           | F57B9.6 ( <i>inf-1</i> )           | 3e-141   | NP_001958.1 ( <i>EIF4A2</i> )  | 1e-172 | eukaryotic translation initiation factor 4A, isoform 2, EIF4A, involved in nonsense mediated decay |
| CG9143    | <i>CG9143</i> | YBR142W ( <i>MAK5</i> )               | 3.9e-52                            | F55F8.2a                           | 1.1e-100 | NP_065147.1 ( <i>DDX24</i> )   | 1e-115 | ---                                                                                                |
| CG9253    | <i>CG9253</i> | YHR065C ( <i>RRP3</i> )               | 1.4e-110                           | T26G10.1                           | 1.4e-148 | NP_057439.2 ( <i>DDX47</i> )   | 0.0    | ---                                                                                                |
| CG9323    | <i>CG9323</i> | YGL120C ( <i>PRP43</i> )              | 3.4e-76                            | T07D4.3 ( <i>rha-1</i> )           | 2.2e-90  | NP_065916.1 ( <i>DHX36</i> )   | 0.0    | Prp43 Homolog                                                                                      |
| CG9594    | <i>Chd3</i>   | YER164W ( <i>CHD1</i> )               | 2.2e-121                           | F26F12.7 ( <i>let-418</i> )        | 1.9e-235 | NP_001264.1 ( <i>CHD4</i> )    | 0.0    | chromodomain helicase DNA binding protein 4                                                        |
| CG9680    | <i>Dbp73D</i> | YNR038W ( <i>DBP6</i> )               | 2.2e-36                            | R05D11.4                           | 7.2e-31  | NP_778236.1 ( <i>DDX51</i> )   | 2e-87  | ---                                                                                                |
| CG9696    | <i>dom</i>    | YDR334W ( <i>SWR1</i> )               | 3.1e-212                           | Y111B2A.23                         | 5.1e-264 | NP_006653.1 ( <i>SRCAP</i> )   | 0.0    | Snf2-related CBP activator protein                                                                 |
| CG9748    | <i>bel</i>    | YOR204W ( <i>DED1</i> )               | 5.2e-147                           | Y54E10A.9a ( <i>vbh-1</i> )        | 1.4e-127 | NP_001347.2 ( <i>DDX3X</i> )   | 0.0    | ---                                                                                                |
