# Supplementary material
Source: PubMed Central journal article supplement (PMC528766)
Supplement: pnas_101_45_15974__9.pdf [file pnas_101_45_15974__9.pdf]

Table 2. Genes Containing RNA Recognition Motifs in InterPro Database

| CG Number | Gene Name            | Best <i>S. cerevisiae</i> | Match Score | Best <i>C. elegans</i>     | Match Score | Best <i>H. sapiens</i>          | Match | Score    | Comments                                                                                      |
|-----------|----------------------|---------------------------|-------------|----------------------------|-------------|---------------------------------|-------|----------|-----------------------------------------------------------------------------------------------|
| CG10084   | <i>CG10084</i>       | YDR151C ( <i>CTH1</i> )   | 0.54        | B0336.3                    | 1.1e-40     | NP_071401.3 ( <i>c13orf10</i> ) |       | 1.0e-105 | Similar to cutaneous T-cell lymphoma tumor antigen                                            |
| CG10128   | <i>tra2</i>          | YGR159C ( <i>NSR1</i> )   | 1.8e-09     | C18D11.4 ( <i>rsp-8</i> )  | 4.1e-25     | NP_037425.1 ( <i>TRA2A</i> )    |       | 2.0e-42  | Splicing regulator, regulates <i>doublesex</i> and <i>fruitless</i>                           |
| CG10203   | <i>xl6</i>           | YDR432W ( <i>NPL3</i> )   | 2.4e-06     | C33H5.12a ( <i>rsp-6</i> ) | 1.4e-22     | NP_003008.1 ( <i>SFRS3</i> )    |       | 3.0e-32  | Similar to the SR Protein SRp20                                                               |
| CG10327   | <i>TBPH</i>          | YOL123W ( <i>HRP1</i> )   | 8.7e-20     | F44G4.4a                   | 5.6e-52     | NP_031401.1 ( <i>TARDBP</i> )   |       | 5e-97    | Similar to TAR Binding Protein                                                                |
| CG10328   | <i>nonA-l</i>        | YER165W ( <i>PAB1</i> )   | 2.6e-07     | F25B5.7a                   | 9.7e-57     | NP_005057.1 ( <i>SFPQ</i> )     |       | 3e-73    | splicing factor proline/glutamine rich (polypyrimidine tract binding protein associated), PSF |
| CG10851   | <i>B52</i>           | YDR432W ( <i>NPL3</i> )   | 8.8e-14     | W02B12.2 ( <i>rsp-2</i> )  | 2.8e-42     | NP_006266.2 ( <i>SFRS6</i> )    |       | 8e-97    | Similar to the SR Protein SRp55                                                               |
| CG10881   | <i>CG10881</i>       | YDR429C ( <i>TIF35</i> )  | 1.4e-30     | F22B5.2 ( <i>EIF-3.G</i> ) | 8.0e-38     | NP_003746.1 ( <i>EIF3S4</i> )   |       | 3e-61    | eukaryotic translation initiation factor 3, subunit 4 delta, eIF3-p44                         |
| CG10922   | <i>La</i>            | YDL051W ( <i>LHP1</i> )   | 3.8e-15     | C44E4.4                    | 1.6e-39     | NP_003133.1 ( <i>SSB</i> )      |       | 2e-50    | Sjogren syndrome antigen B (autoantigen La)                                                   |
| CG11023   | <i>CG11023</i>       | YPL020C ( <i>UPL1</i> )   | 7.3e-26     | T10F2.3                    | 6.1e-48     | NP_055369.1 ( <i>SENPI</i> )    |       | 6e-54    | SUMO1/sentrin specific protease 1                                                             |
| CG11266   | <i>CG11266</i>       | YGR159C ( <i>NSR1</i> )   | 2.4e-13     | Y55F3AM.3a                 | 5.0e-84     | NP_004893.1 ( <i>RNPC2</i> )    |       | 1e-146   | Similar to CC1.3/CAPER, Couples transcription and splicing                                    |
| CG11454   | <i>CG11454</i>       | YIR001C ( <i>SGN1</i> )   | 1.1e-06     | Y37D8A.21                  | 2.0e-09     | NP_057174.1 ( <i>RBM7</i> )     |       | 6e-18    | RNA binding motif protein 7                                                                   |
| CG11505   | <i>CG11505</i>       | YCL037C ( <i>SRO9</i> )   | 1.8e-05     | T12F5.5b ( <i>pqn-64</i> ) | 9.3e-31     | NP_954658.1                     |       | 7e-60    | LOC113251: c-Mpl binding protein                                                              |
| CG12085   | <i>pUf68, hfp</i>    | YER165W ( <i>PAB1</i> )   | 6.4e-15     | Y47G6A.20b ( <i>mp-6</i> ) | 1.5e-99     | NP_055096.2 ( <i>SIAHBP1</i> )  |       | 1e-145   | regulates alternative splicing, fuse-binding protein-interacting repressor, PUF-60            |
| CG12288   | <i>CG12288</i>       | YOL041C ( <i>NOP12</i> )  | 1.9e-12     | F11A10.7                   | 2.1e-16     | NP_055829.1 ( <i>KIAA0117</i> ) |       | 1e-28    | KIAA0117 protein                                                                              |
| CG12581   | <i>CG12581</i>       | YAL001C ( <i>TFC3</i> )   | 0.96        | R148.5a                    | 2.4e-58     | NP_006112.2 ( <i>KRT1</i> )     |       | 1e-05    | keratin 1                                                                                     |
| CG12749   | <i>Hrb87F, hrp36</i> | YOL123W ( <i>HRP1</i> )   | 1.6e-36     | F42A6.7a ( <i>hrp-1</i> )  | 7.5e-49     | NP_112420.1 ( <i>HNRPA1</i> )   |       | 1e-99    | Similar to hnRNP A1                                                                           |
| CG1316    | <i>CG1316</i>        | YOL123W ( <i>HRP1</i> )   | 3.0e-09     | F35H8.5 ( <i>exc-7</i> )   | 4.7e-14     | NP_694453.1 ( <i>DRB1</i> )     |       | 2e-60    | developmentally regulated RNA-binding protein 1                                               |
| CG13298   | <i>CG13298</i>       | YGL044C ( <i>RNA15</i> )  | 3.2e-09     | C50D2.5                    | 1.2e-43     | NP_057131.1 ( <i>P14</i> )      |       | 2e-51    | pre-mRNA branch site protein p14                                                              |
| CG13793   | <i>CG13793</i>       | YMR279C                   | 0.36        | M01G5.5 ( <i>snf-6</i> )   | 4.7e-13     | NP_055043.1 ( <i>SLC6A7</i> )   |       | 1e-33    | solute carrier family 6, member 7                                                             |
| CG13796   | <i>CG13796</i>       | YJR117W ( <i>STE24</i> )  | 0.29        | M01G5.5 ( <i>snf-6</i> )   | 2.0e-24     | NP_004202.1 ( <i>SLC6A5</i> )   |       | 8e-20    | solute carrier family 6, member 5                                                             |
| CG14230   | <i>CG14230</i>       | YNL004W ( <i>HRB1</i> )   | 0.0024      | K07F5.14                   | 0.00033     | NP_060418.3 ( <i>NOL8</i> )     |       | 1e-17    | Similar to Nop132, nucleolar protein                                                          |
| CG14414   | <i>CG14414</i>       | YGL044C ( <i>RNA15</i> )  | 7.5e-07     | R06C1.4                    | 0.00030     | NP_149108.1 ( <i>RBM18</i> )    |       | 9e-24    | RNA binding motif protein 18                                                                  |
| CG14506   | <i>CG14506</i>       | YHL024W ( <i>RIM4</i> )   | 0.0031      | Y73B6BL.6                  | 0.036       | XP_377262.1                     |       | 6e-07    | similar to Hypothetical protein CBG01854                                                      |
| CG14641   | <i>CG14641</i>       | YBR065C ( <i>ECM2</i> )   | 2.1e-15     | T11G6.8                    | 2.0e-112    | NP_060517.1                     |       | 1e-146   | hypothetical protein FLJ10290                                                                 |
| CG14648   | <i>CG14648</i>       | YKR092C ( <i>SRP40</i> )  | 0.60        | B0041.7 ( <i>xnp-1</i> )   | 0.66        | NP_073601.1                     |       | 3e-43    | hypothetical protein FLJ12998                                                                 |

| CG Number | Gene Name        | Best <i>S. cerevisiae</i> Match Score | Best <i>C. elegans</i> Match Score | Best <i>H. sapiens</i> Match Score | Score    | Comments                       |        |                                                                                                            |
|-----------|------------------|---------------------------------------|------------------------------------|------------------------------------|----------|--------------------------------|--------|------------------------------------------------------------------------------------------------------------|
| CG14718   | <i>CG14718</i>   | YNL286W ( <i>CUS2</i> )               | 0.0020                             | C27H5.3                            | 2.0e-11  | NP_004951.1 ( <i>FUS</i> )     | 2e-16  | fusion (involved in t(12;16) in malignant liposarcoma), TLS, FUS1                                          |
| CG14891   | <i>CG14891</i>   | YJR090C ( <i>GRR1</i> )               | 5.2e-05                            | EEED8.10                           | 0.00015  | NP_659469.2 ( <i>FBXL13</i> )  | 7e-07  | F-box and leucine-rich repeat protein 13                                                                   |
| CG16788   | <i>RnpS1</i>     | YPR112C ( <i>MRD1</i> )               | 3.8e-08                            | K02F3.11 ( <i>mp-5</i> )           | 3.2e-18  | NP_006702.1 ( <i>RNPS1</i> )   | 1e-54  | Involved in mRNA nuclear export and mRNA surveillance                                                      |
| CG16901   | <i>sqd</i>       | YOL123W ( <i>HRP1</i> )               | 5.7e-34                            | Y73B6BL.6                          | 1.5e-34  | NP_112737.1 ( <i>HNRPD</i> )   | 4e-60  | RNA binding protein, hnRNP homolog, regulates <i>gurken</i> mRNA localization in <i>Drosophila</i> embryos |
| CG17136   | <i>Rbp1</i>      | YIR005W ( <i>IST3</i> )               | 8.9e-06                            | C33H5.12a ( <i>rsp-6</i> )         | 1.0e-21  | NP_003008.1 ( <i>SFRS3</i> )   | 3e-39  | Similar to the SR Protein SRp20                                                                            |
| CG17838   | <i>CG17838</i>   | YER165W ( <i>PAB1</i> )               | 4.7e-17                            | F58D5.1 ( <i>hrp-2</i> )           | 6.2e-109 | NP_005817.1 ( <i>RNRPR</i> )   | 1e-146 | Similar to hnRNP R                                                                                         |
| CG18259   | <i>CG18259</i>   | YDR432W ( <i>NPL3</i> )               | 0.0020                             | R09B3.2                            | 0.029    | NP_115687.2 ( <i>POLDIP3</i> ) | 2e-09  | Similar to DNA polymerase interacting protein                                                              |
| CG18350   | <i>Sxl</i>       | YER165W ( <i>PAB1</i> )               | 7.2e-18                            | F35H8.5 ( <i>exc-7</i> )           | 1.5e-41  | NP_004423.1 ( <i>ELAVL2</i> )  | 7e-50  | Regulates alternative splicing, regulates translation                                                      |
| CG18497   | <i>spen</i>      | YNL016W ( <i>PUB1</i> )               | 4.5e-06                            | F29C4.7a                           | 8.0e-18  | NP_055816.2 ( <i>SHARP</i> )   | 3e-89  | SMART/HDAC1 associated repressor protein                                                                   |
| CG18823   | <i>CG18823</i>   | YPL190C ( <i>NAB3</i> )               | 6.8e-05                            | Y116A8C.34 ( <i>cyp-13</i> )       | 0.0016   | NP_058522.1 ( <i>RBMS1</i> )   | 5e-04  | RNA binding motif, single stranded interacting protein 1                                                   |
| CG1987    | <i>Rbp1-like</i> | YBR212W ( <i>NGR1</i> )               | 8.3e-07                            | C33H5.12a ( <i>rsp-6</i> )         | 1.3e-21  | NP_003008.1 ( <i>SFRS3</i> )   | 4e-32  | Similar to the SR Protein SRp20                                                                            |
| CG2050    | <i>mod</i>       | YOL031C                               | 0.5                                | F11A10.7                           | 9.3e-06  | NP_005372.1 ( <i>NCL</i> )     | 1e-17  | nucleolin                                                                                                  |
| CG2910    | <i>nito</i>      | YBR212W ( <i>NGR1</i> )               | 7.9e-06                            | F29C4.7a                           | 9.0e-41  | NP_037418.2                    | 8e-88  | HUMAGCGB: chromosome 3p21.1 gene sequence                                                                  |
| CG2931    | <i>CG2931</i>    | YNL016W ( <i>PUB1</i> )               | 4.2e-14                            | Y54H5A.3                           | 4.1e-48  | NP_077297.2                    | 3e-48  | MGC10433: hypothetical protein MGC10433                                                                    |
| CG3038    | <i>CG3038</i>    | YJL006C ( <i>CTK2</i> )               | 0.062                              | C47F8.6                            | 1.2e-14  | NP_149360.1 ( <i>B3GALT5</i> ) | 5e-19  | UDP-Gal:betaGlcNAc beta 1,3-galactosyltransferase, polypeptide 5                                           |
| CG31000   | <i>heph</i>      | YIR009W ( <i>MSL1</i> )               | 2.9e-07                            | D2089.4a ( <i>ptb-1</i> )          | 9.8e-130 | NP_002810.1 ( <i>PTBP1</i> )   | 1e-158 | Similar to polyprimidine tract binding protein (PTB)                                                       |
| CG31243   | <i>cpo</i>       | YIR009W ( <i>MSL1</i> )               | 6.9e-05                            | F46A9.6 ( <i>mec-8</i> )           | 8.2e-42  | NP_919248.1 ( <i>RBPM5</i> )   | 3e-36  | RNA-binding protein with multiple splicing 2                                                               |
| CG3151    | <i>Rbp9</i>      | YER165W ( <i>PAB1</i> )               | 1.1e-24                            | F35H8.5 ( <i>exc-7</i> )           | 8.9e-91  | NP_004423.1 ( <i>ELAVL2</i> )  | 1e-115 | ELAV-like 2 (Hu antigen B)                                                                                 |
| CG3162    | <i>CG3162</i>    | YGR159C ( <i>NSR1</i> )               | 1.7e-08                            | Y92C3B.2a ( <i>uaf-1</i> )         | 7.2e-85  | NP_009210.1 ( <i>U2AF2</i> )   | 1e-113 | Related to large U2AF subunit                                                                              |
| CG31716   | <i>CG31716</i>   | YER068W ( <i>MOT2</i> )               | 7.7e-28                            | C49H3.5a ( <i>ntl-4</i> )          | 4.4e-88  | NP_037448.1 ( <i>CNOT4</i> )   | 1e-109 | CCR4-NOT transcription complex, subunit 4                                                                  |
| CG31762   | <i>aret</i>      | YER165W ( <i>PAB1</i> )               | 9.3e-20                            | T01D1.2a ( <i>etr-1</i> )          | 3.0e-92  | NP_006552.1 ( <i>CUGBP2</i> )  | 1e-113 | CUG triplet repeat, RNA binding protein 2, Etr-3, NAPOR, BRUNOL3                                           |
| CG31990   | <i>CG31990</i>   | YER112W ( <i>LSM4</i> )               | 1.6e-13                            | F32A5.7 ( <i>lsm-4</i> )           | 1.2e-34  | NP_036453.1 ( <i>LSM4</i> )    | 8e-47  | LSM4 homolog, U6 small nuclear RNA associated                                                              |
| CG31992   | <i>CG31992</i>   | YKR092C ( <i>SRP40</i> )              | 0.081                              | ZK643.8 ( <i>gri-25</i> )          | 0.00092  | NP_061869.2                    | 1e-76  | Similar to human KIAA1582 prote                                                                            |
| CG32062   | <i>CG32062</i>   | YNL110C ( <i>NOP15</i> )              | 8.5e-06                            | T07D1.4 ( <i>fox-1</i> )           | 3.8e-36  | NP_061193.2 ( <i>A2BP1</i> )   | 6e-41  | ataxin 2-binding protein 1, Fox1, splicing regulator                                                       |
| CG32423   | <i>CG32423</i>   | YOL123W ( <i>HRP1</i> )               | 1.1e-13                            | R10E4.2a                           | 3.6e-49  | NP_055298.1 ( <i>RBMS3</i> )   | 6e-66  | RNA binding motif, single stranded interacting protein                                                     |
| CG3312    | <i>Rnp4F</i>     | YCL011C ( <i>GBP2</i> )               | 7.5e-08                            | B0035.12                           | 2.7e-14  | NP_055521.1 ( <i>SART3</i> )   | 2e-17  | squamous cell carcinoma antigen recognized by T cells                                                      |

| CG Number | Gene Name     | Best <i>S. cerevisiae</i> Match Score | Best <i>C. elegans</i> Match Score | Best <i>H. sapiens</i> Match Score | Score   | Comments                      |        |                                                                                                        |
|-----------|---------------|---------------------------------------|------------------------------------|------------------------------------|---------|-------------------------------|--------|--------------------------------------------------------------------------------------------------------|
| CG3582    | <i>U2af38</i> | YER165W ( <i>PAB1</i> )               | 0.066                              | Y116A8C.35 ( <i>uaf-2</i> )        | 1.5e-66 | NP_006749.1 ( <i>U2AF1</i> )  | 1e-105 | Small U2AF subunit                                                                                     |
| CG3594    | <i>Eap</i>    | YPR112C ( <i>MRD1</i> )               | 2.0e-07                            | R09B3.3                            | 4.1e-09 | NP_057280.1 ( <i>RBM19</i> )  | 1e-11  | RNA binding motif protein 19                                                                           |
| CG3606    | <i>caz</i>    | YNL286W ( <i>CUS2</i> )               | 1.7e-07                            | C27H5.3                            | 2.2e-22 | NP_004951.1 ( <i>FUS</i> )    | 4e-80  | fusion (involved in t(12;16) in malignant liposarcoma), TLS, FUS1                                      |
| CG3780    | <i>Spx</i>    | YOR319W ( <i>HSH49</i> )              | 8.7e-31                            | C08B11.5 ( <i>sap-49</i> )         | 1.4e-93 | NP_005841.1 ( <i>SF3B4</i> )  | 1e-126 | splicing factor 3b, subunit 4, 49kDa, SAP49                                                            |
| CG3808    | <i>CG3808</i> | YKR056W ( <i>TRM2</i> )               | 1.2e-09                            | H24K24.4                           | 6.3e-52 | NP_892029.2 ( <i>HTF9C</i> )  | 2e-94  | HpaII tiny fragments locus 9C                                                                          |
| CG3884    | <i>CG3884</i> | YGR255C ( <i>COQ6</i> )               | 0.24                               | C12D8.14                           | 0.090   | NP_002448.1 ( <i>MUC2</i> )   | 2e-13  | ---                                                                                                    |
| CG4119    | <i>CG4119</i> | YDR006C ( <i>SOK1</i> )               | 0.0097                             | W04D2.6a                           | 3.3e-49 | XP_027330.7 ( <i>RNPC7</i> )  | 1e-98  | RNA-binding region (RNP1, RRM) containing 7                                                            |
| CG4266    | <i>CG4266</i> | YNL251C ( <i>NRD1</i> )               | 0.00039                            | D1007.7                            | 4.4e-41 | NP_065757.1 ( <i>SFRS15</i> ) | 1e-70  | splicing factor, arginine/serine-rich 15, SR protein rA4                                               |
| CG4329    | <i>CG4329</i> | YDL058W ( <i>USO1</i> )               | 3.7e-11                            | T10G3.5                            | 7.5e-12 | NP_689711.1                   | 9e-60  | ---                                                                                                    |
| CG4396    | <i>fne</i>    | YER165W ( <i>PAB1</i> )               | 9.2e-23                            | F35H8.5 ( <i>exc-7</i> )           | 7.4e-89 | NP_004423.1 ( <i>ELAVL2</i> ) | 1e-112 | ELAV-like 2 (Hu antigen B)                                                                             |
| CG4429    | <i>Rbp2</i>   | YGR159C ( <i>NSR1</i> )               | 7.2e-07                            | T12D8.2                            | 2.1e-09 | NP_071496.1 ( <i>WBSCR1</i> ) | 6e-37  | Williams-Beuren syndrome chromosome region 1, EIF4H                                                    |
| CG4476    | <i>CG4476</i> | YCR021C ( <i>HSP30</i> )              | 0.45                               | T23G5.5 ( <i>dat-1</i> )           | 3.9e-84 | NP_004202.1 ( <i>SLC6A5</i> ) | e-113  | solute carrier family 6, member 5                                                                      |
| CG4528    | <i>snf</i>    | YIR009W ( <i>MSL1</i> )               | 3.6e-09                            | K08D10.3 ( <i>mp-3</i> )           | 9.5e-42 | NP_003083.1 ( <i>SNRPB2</i> ) | 6e-82  | RNA binding protein, similar to U1A and U2B", component of U1snRNP and U2 snRNP                        |
| CG4602    | <i>Srp54</i>  | YPL122C ( <i>TFB2</i> )               | 0.81                               | D2089.1a ( <i>rsp-7</i> )          | 2.6e-39 | NP_004759.1 ( <i>SFRS11</i> ) | 4e-42  | SR Protein, couples transcription and splicing                                                         |
| CG4612    | <i>CG4612</i> | YER165W ( <i>PAB1</i> )               | 2.5e-42                            | Y106G6H.2a ( <i>pab-1</i> )        | 3.4e-46 | NP_003810.1 ( <i>PABPC4</i> ) | 5e-49  | RNA binding protein, similar to cytoplasmic poly(A) binding protein                                    |
| CG4760    | <i>bol</i>    | YOL123W ( <i>HRP1</i> )               | 9.8e-10                            | F56D1.7 ( <i>daz-1</i> )           | 3.4e-17 | NP_932074.1 ( <i>BOLL</i> )   | 3e-33  | bol, boule-like (Drosophila)                                                                           |
| CG4787    | <i>CG4787</i> | YNL016W ( <i>PUB1</i> )               | 5.8e-08                            | C18A3.5a                           | 3.0e-29 | NP_071505.1 ( <i>TIA1</i> )   | 2e-41  | Similar to TIA-1                                                                                       |
| CG4806    | <i>CG4806</i> | YPL043W ( <i>NOP4</i> )               | 2.9e-25                            | R05H10.2                           | 6.0e-56 | NP_060547.1                   | 4e-91  | hypothetical protein FLJ10377                                                                          |
| CG4887    | <i>CG4887</i> | YNL224C                               | 0.0011                             | T08B2.5f                           | 1.9e-35 | NP_005667.2 ( <i>RBM10</i> )  | 4e-99  | RNA binding motif protein 10                                                                           |
| CG5099    | <i>msi</i>    | YOL123W ( <i>HRP1</i> )               | 2.1e-45                            | R10E9.1 ( <i>msi-1</i> )           | 6.0e-56 | NP_620412.1 ( <i>MSI2</i> )   | 2e-63  | regulates translation                                                                                  |
| CG5213    | <i>CG5213</i> | YGR159C ( <i>NSR1</i> )               | 1.5e-10                            | F35H8.5 ( <i>exc-7</i> )           | 5.5e-30 | NP_068771.1 ( <i>ELAVL4</i> ) | 6e-36  | ELAVL4: ELAV-like 4 (Hu antigen D)                                                                     |
| CG5422    | <i>Rox8</i>   | YNL016W ( <i>PUB1</i> )               | 9.8e-39                            | C18A3.5a                           | 2.5e-74 | NP_003243.1 ( <i>TIAL1</i> )  | 7e-83  | RNA binding protein, similar to TIA-1, binds to U-rich sequences downstream of 5' splice sites         |
| CG5442    | <i>SC35</i>   | YIR005W ( <i>IST3</i> )               | 9.6e-09                            | EEED8.7a ( <i>rsp-4</i> )          | 2.6e-30 | NP_003007.1 ( <i>SFRS2</i> )  | 1e-52  | Similar to SR Protein SC35                                                                             |
| CG5655    | <i>Rsf1</i>   | YIR001C ( <i>SGN1</i> )               | 4.6e-07                            | C33H5.12a ( <i>rsp-6</i> )         | 8.9e-14 | NP_003008.1 ( <i>SFRS3</i> )  | 8e-19  | Antagonizes SR proteins                                                                                |
| CG5735    | <i>CG5735</i> | YGR159C ( <i>NSR1</i> )               | 0.0032                             | C40H1.1 ( <i>cbp-1</i> )           | 2.0e-71 | NP_085130.1 ( <i>CPEB4</i> )  | 1e-143 | Similar to CPEB - cytoplasmic polyadenylation element binding protein, regulates poly(A) tail addition |

| CG Number | Gene Name       | Best <i>S. cerevisiae</i> Match Score | Best <i>C. elegans</i> Match Score | Best <i>H. sapiens</i> Match Score | Score    | Comments                       |        |                                                                                                      |
|-----------|-----------------|---------------------------------------|------------------------------------|------------------------------------|----------|--------------------------------|--------|------------------------------------------------------------------------------------------------------|
| CG5808    | CG5808          | YHR057C ( <i>CYP2</i> )               | 2.0e-09                            | F39H2.2a ( <i>cyp-14</i> )         | 5.0e-105 | NP_624311.1 ( <i>PPIL4</i> )   | 1e-132 | peptidylprolyl isomerase (cyclophilin)-like 4                                                        |
| CG6049    | CG6049          | YNL286W ( <i>CUS2</i> )               | 4.5e-16                            | Y65B4A.1                           | 3.2e-66  | NP_055315.2 ( <i>HTATSF1</i> ) | 2e-87  | HIV TAT specific factor 1                                                                            |
| CG6113    | CG6113          | YKL140W ( <i>TGL1</i> )               | 6.2e-31                            | Y57E12B.3                          | 2.1e-69  | NP_000226.1 ( <i>LIPA</i> )    | 1e-72  | lipase A, lysosomal acid, cholesterol esterase                                                       |
| CG6319    | <i>bru-2</i>    | YER165W ( <i>PAB1</i> )               | 4.7e-15                            | T01D1.2a ( <i>etr-1</i> )          | 2.2e-102 | NP_006551.1 ( <i>CUGBP1</i> )  | 1e-116 | CUG triplet repeat, RNA binding protein 1, BRUNOL2                                                   |
| CG6937    | CG6937          | YNL110C ( <i>NOP15</i> )              | 8.7e-15                            | T04A8.6                            | 2.3e-17  | NP_115766.2 ( <i>MKI67IP</i> ) | 2e-25  | MKI67 (FHA domain) interacting nucleolar phosphoprotein                                              |
| CG6946    | CG6946          | YNL004W ( <i>HRB1</i> )               | 4.2e-06                            | Y73B6BL.33                         | 2.5e-41  | NP_062543.1 ( <i>HNRPH2</i> )  | 1e-41  | heterogeneous nuclear ribonucleoprotein H2 (H')                                                      |
| CG6961    | CG6961          | YDR432W ( <i>NPL3</i> )               | 0.0021                             | R09B3.2                            | 0.029    | NP_115687.2 ( <i>POLDIP3</i> ) | 1e-09  | polymerase (DNA-directed), delta interacting protein 3                                               |
| CG6987    | <i>SF2</i>      | YNL004W ( <i>HRB1</i> )               | 1.1e-12                            | Y111B2A.18 ( <i>rsp-3</i> )        | 4.7e-53  | NP_008855.1 ( <i>SFRS1</i> )   | 1e-80  | Similar to the SR protein ASF/SF2                                                                    |
| CG6995    | CG6995          | YGR159C ( <i>NSR1</i> )               | 4.1e-05                            | ZC404.8 ( <i>spn-4</i> )           | 3.2e-07  | XP_375559.1 ( <i>SAFB2</i> )   | 3e-59  | scaffold attachment factor B2                                                                        |
| CG6999    | CG6999          | YNR054C                               | 4.9e-12                            | F57B10.8                           | 4.4e-13  | NP_037507.1 ( <i>ABT1</i> )    | 1e-11  | activator of basal transcription 1                                                                   |
| CG7185    | CG7185          | YER165W ( <i>PAB1</i> )               | 0.014                              | D1046.1                            | 3.9e-34  | NP_008938.1 ( <i>CPSF6</i> )   | 1e-107 | cleavage and polyadenylation specific factor 6, 68kDa, CFIm-68k                                      |
| CG7697    | <i>CstF-64</i>  | YGL044C ( <i>RNA15</i> )              | 1.7e-30                            | F56A8.6 ( <i>cpf-2</i> )           | 3.7e-57  | NP_001316.1 ( <i>CSTF2</i> )   | 2e-83  | cleavage stimulation factor, 3' pre-RNA, subunit 2, 64kDa CstF64                                     |
| CG7804    | CG7804          | YOL123W ( <i>HRP1</i> )               | 1.0e-22                            | F44G4.4a                           | 6.5e-44  | NP_031401.1 ( <i>TARDBP</i> )  | 2e-81  | TAR DNA binding protein                                                                              |
| CG7879    | CG7879          | YPR112C ( <i>MRD1</i> )               | 0.00012                            | Y106G6D.7                          | 2.5e-24  | NP_006038.2 ( <i>RBM12</i> )   | 1e-28  | RNA binding motif protein 12                                                                         |
| CG7903    | CG7903          | YPL190C ( <i>NAB3</i> )               | 4.1e-05                            | ZK863.7 ( <i>mp-1</i> )            | 0.00018  | NP_003478.1 ( <i>TAF15</i> )   | 3e-15  | TAF15 RNA polymerase II, TATA box binding protein (TBP)-associated factor, 68kDa                     |
| CG7981    | <i>trol</i>     | YOR031W ( <i>CRS</i> )                | 0.0076                             | ZC101.2e ( <i>unc-52</i> )         | 1.7e-225 | NP_005520.2 ( <i>HSPG2</i> )   | 0.0    | heparan sulfate proteoglycan 2 (perlecan)                                                            |
| CG8021    | CG8021          | YOL123W ( <i>HRP1</i> )               | 6.0e-10                            | R06C1.4                            | 5.8e-10  | NP_002129.2 ( <i>HNRPD</i> )   | 5e-12  | heterogeneous nuclear ribonucleoprotein D (AU-rich element RNA binding protein 1, 37kDa)             |
| CG8205    | <i>fus</i>      | YGL044C ( <i>RNA15</i> )              | 0.12                               | ZK1067.6                           | 1.2e-88  | NP_079215.1                    | 1e-113 | hypothetical protein FLJ21918                                                                        |
| CG8749    | <i>snRNP70K</i> | YIL061C ( <i>SNP1</i> )               | 2.5e-17                            | K04G7.10 ( <i>mp-7</i> )           | 1.7e-49  | NP_003080.2 ( <i>SNRP70</i> )  | 1e-107 | small nuclear ribonucleoprotein 70kDa polypeptide (RNP antigen), U1-70K, component of U1 snRNP       |
| CG8781    | <i>tsu</i>      | YIR005W ( <i>IST3</i> )               | 5.7e-11                            | R07E5.14 ( <i>mp-4</i> )           | 3.9e-36  | NP_005096.1 ( <i>RBM8A</i> )   | 3e-56  | RNA binding motif protein 8A, Y14                                                                    |
| CG9218    | <i>sm</i>       | YIR009W ( <i>MSL1</i> )               | 0.026                              | C44B7.2a                           | 1.7e-62  | NP_001524.1 ( <i>HNRPL</i> )   | 6e-83  | heterogeneous nuclear ribonucleoprotein L                                                            |
| CG9373    | CG9373          | YNL004W ( <i>HRB1</i> )               | 2.6e-14                            | C25A1.4                            | 2.3e-49  | NP_057216.2 ( <i>MYEF2</i> )   | 5e-66  | myelin expression factor 2                                                                           |
| CG9412    | <i>rin</i>      | YER009W ( <i>NTF2</i> )               | 1.3e-10                            | R05D11.3 ( <i>ran-4</i> )          | 6.8e-11  | NP_005745.1 ( <i>G3BP</i> )    | 2e-46  | Ras-GTPase-activating protein SH3-domain-binding protein                                             |
| CG9809    | CG9809          | YHL024W ( <i>RIM4</i> )               | 0.0011                             | Y116A8C.34 ( <i>cyp-13</i> )       | 0.0014   | NP_055877.3 ( <i>PPRC1</i> )   | 3e-28  | peroxisome proliferative activated receptor, gamma, coactivator-related 1, PGC-1 related coactivator |

| CG Number | Gene Name      | Best <i>S. cerevisiae</i> Match Score | Best <i>C. elegans</i> Match Score | Best <i>H. sapiens</i> Match Score | Score    | Comments                      |        |                                                        |
|-----------|----------------|---------------------------------------|------------------------------------|------------------------------------|----------|-------------------------------|--------|--------------------------------------------------------|
| CG9983    | <i>Hrb98DE</i> | YOL123W ( <i>HRP1</i> )               | 2.3e-37                            | F42A6.7a ( <i>hrp-1</i> )          | 1.2e-48  | NP_112420.1 ( <i>HNRPA1</i> ) | 2e-92  | heterogeneous nuclear ribonucleoprotein A1             |
| CG9998    | <i>U2af50</i>  | YGL044C ( <i>RNA15</i> )              | 8.9e-08                            | Y92C3B.2a ( <i>uaf-1</i> )         | 3.9e-107 | NP_009210.1 ( <i>U2AF2</i> )  | 1e-166 | U2 (RNU2) small nuclear RNA auxiliary factor 2, U2AF65 |
