# Supplementary material
Source: PubMed Central journal article supplement (PMC528766)
Supplement: pnas_101_45_15974__16.pdf [file pnas_101_45_15974__16.pdf]

**Table 9. Quantitation of genes that affect dAdar splicing**

| <b>dsRNA</b> | <b>3a+</b> | <b>3a-</b> |
|--------------|------------|------------|
| untreated    | 88.24%     | 11.76%     |
| CG10851      | 50.10%     | 49.90%     |
| CG12085      | 80.70%     | 19.30%     |
| CG3193       | 61.40%     | 38.60%     |
| CG4119       | 74.60%     | 25.40%     |
| CG5422       | 51.90%     | 48.10%     |
| CG5454       | 32.40%     | 67.60%     |
| CG8749       | 31.90%     | 68.10%     |
