# Supplementary material
Source: PubMed Central journal article supplement (PMC528766)
Supplement: pnas_101_45_15974__18.pdf [file pnas_101_45_15974__18.pdf]

**Table 11. Quantitation of genes that affect para exons A and I splicing**

| <b>dsRNA</b> | <b>I+A+</b> | <b>I+A-</b> | <b>I-A+</b> | <b>I-A-</b> |
|--------------|-------------|-------------|-------------|-------------|
| untreated    | 10.85%      | 66.90%      | 5.80%       | 16.45%      |
| CG10293      | 25.20%      | 70.40%      | 1.20%       | 3.30%       |
| CG10418      | 9.10%       | 57.20%      | 33.10%      | 0.60%       |
| CG10445      | 2.30%       | 95.60%      | 1.60%       | 0.50%       |
| CG11360      | 11.20%      | 80.20%      | 2.30%       | 6.20%       |
| CG12759      | 15.80%      | 70.80%      | 10.10%      | 3.30%       |
| CG12924      | 8.43%       | 16.90%      | 2.10%       | 0.00%       |
| CG1646       | 10.20%      | 76.90%      | 7.60%       | 5.30%       |
| CG5728       | 11.70%      | 80.50%      | 2.10%       | 5.80%       |
| CG6197       | 13.20%      | 84.60%      | 0.10%       | 2.10%       |
| CG8144       | 26.10%      | 64.10%      | 5.80%       | 4.00%       |
| CG9075       | 9.50%       | 83.60%      | 2.00%       | 4.90%       |
