# Supplementary material
Source: PubMed Central journal article supplement (PMC528766)
Supplement: pnas_101_45_15974__19.pdf [file pnas_101_45_15974__19.pdf]

**Table 12. Quantitation of genes that affect Dscam exon 4 splicing**

| <b>dsRNA</b> | <b>exon 4.1</b> | <b>exon 4.2</b> | <b>exon 4.3/12</b> | <b>exon 4.4</b> | <b>exon 4.5/7/9</b> | <b>exon 4.6</b> | <b>exon 4.8</b> | <b>exon 4.10</b> | <b>exon 4.11</b> | <b>skipping</b> |
|--------------|-----------------|-----------------|--------------------|-----------------|---------------------|-----------------|-----------------|------------------|------------------|-----------------|
| untreated    | 37.61%          | 5.44%           | 19.89%             | 11.35%          | 4.63%               | 4.74%           | 1.56%           | 3.10%            | 7.65%            | 4.03%           |
| CG10210      | 36.12%          | 6.43%           | 14.19%             | 13.14%          | 4.58%               | 4.70%           | 1.37%           | 2.93%            | 11.41%           | 5.13%           |
| CG10279      | 24.42%          | 12.54%          | 12.14%             | 5.35%           | 6.32%               | 8.39%           | 2.75%           | 3.37%            | 10.61%           | 14.10%          |
| CG10293      | 15.44%          | 6.01%           | 19.80%             | 20.63%          | 6.98%               | 6.24%           | 3.80%           | 4.08%            | 11.02%           | 6.01%           |
| CG10851      | 36.94%          | 9.35%           | 9.92%              | 4.36%           | 0.94%               | 5.66%           | 1.32%           | 4.40%            | 22.98%           | 4.14%           |
| CG11266      | 44.07%          | 3.91%           | 9.03%              | 17.28%          | 3.14%               | 4.03%           | 1.33%           | 2.52%            | 9.20%            | 5.48%           |
| CG11360      | 31.36%          | 6.37%           | 15.10%             | 15.50%          | 3.74%               | 2.25%           | 1.09%           | 2.45%            | 11.16%           | 10.97%          |
| CG12085      | 41.27%          | 5.19%           | 7.57%              | 15.31%          | 4.60%               | 3.02%           | 0.00%           | 1.55%            | 15.36%           | 7.07%           |
| CG12749      | 17.12%          | 6.37%           | 16.39%             | 15.19%          | 3.82%               | 0.84%           | 0.65%           | 3.41%            | 21.69%           | 14.52%          |
| CG13425      | 10.39%          | 4.11%           | 25.52%             | 7.00%           | 12.00%              | 4.67%           | 14.94%          | 8.30%            | 7.05%            | 6.02%           |
| CG14641      | 9.71%           | 10.55%          | 34.29%             | 9.16%           | 6.92%               | 2.86%           | 2.16%           | 2.08%            | 16.59%           | 5.69%           |
| CG1658       | 11.22%          | 1.98%           | 5.26%              | 3.51%           | 1.28%               | 3.58%           | 2.72%           | 3.48%            | 8.56%            | 58.40%          |
| CG16901      | 32.04%          | 3.28%           | 22.80%             | 13.92%          | 4.95%               | 5.06%           | 1.60%           | 1.92%            | 7.20%            | 7.22%           |
| CG16941      | 15.26%          | 11.59%          | 15.76%             | 15.04%          | 5.86%               | 4.45%           | 1.64%           | 3.15%            | 16.47%           | 10.77%          |
| CG17454      | 28.92%          | 3.95%           | 22.92%             | 8.14%           | 3.07%               | 5.30%           | 1.93%           | 2.76%            | 14.72%           | 8.29%           |
| CG2926       | 33.92%          | 3.41%           | 21.34%             | 16.22%          | 4.00%               | 3.84%           | 1.97%           | 3.34%            | 7.80%            | 4.16%           |
| CG31762      | 36.83%          | 7.07%           | 17.56%             | 14.27%          | 2.94%               | 3.82%           | 1.57%           | 2.65%            | 8.69%            | 4.60%           |
| CG3582       | 31.91%          | 5.16%           | 6.47%              | 22.16%          | 1.82%               | 1.38%           | 0.00%           | 0.91%            | 17.56%           | 12.63%          |
| CG4528       | 25.55%          | 11.11%          | 19.45%             | 10.44%          | 4.71%               | 6.07%           | 2.92%           | 3.03%            | 8.18%            | 8.53%           |
| CG4602       | 44.67%          | 3.81%           | 8.88%              | 14.85%          | 4.19%               | 2.86%           | 0.00%           | 0.78%            | 13.90%           | 6.06%           |
| CG5422       | 55.63%          | 7.00%           | 8.58%              | 7.42%           | 3.03%               | 4.01%           | 2.19%           | 1.41%            | 6.84%            | 3.88%           |
| CG5442       | 39.23%          | 6.38%           | 21.50%             | 5.78%           | 2.17%               | 3.60%           | 1.11%           | 2.92%            | 9.31%            | 8.00%           |
| CG5931       | 11.62%          | 7.94%           | 13.90%             | 6.52%           | 3.47%               | 7.70%           | 2.73%           | 4.09%            | 24.98%           | 17.06%          |
| CG6197       | 9.00%           | 4.85%           | 24.35%             | 6.97%           | 14.70%              | 4.29%           | 14.60%          | 7.20%            | 6.79%            | 7.27%           |
| CG6227       | 30.54%          | 10.09%          | 13.27%             | 14.37%          | 4.14%               | 4.01%           | 1.47%           | 2.27%            | 11.84%           | 7.99%           |
| CG6841       | 14.30%          | 3.79%           | 18.06%             | 12.62%          | 5.38%               | 6.64%           | 3.62%           | 4.24%            | 22.68%           | 8.68%           |
| CG6995       | 6.47%           | 23.67%          | 11.25%             | 15.42%          | 11.14%              | 7.93%           | 1.43%           | 2.24%            | 8.70%            | 11.74%          |
| CG6999       | 45.05%          | 3.81%           | 8.22%              | 17.55%          | 3.18%               | 4.33%           | 1.38%           | 3.53%            | 7.42%            | 5.53%           |
| CG7185       | 21.60%          | 3.95%           | 8.55%              | 17.14%          | 5.97%               | 8.54%           | 7.79%           | 8.95%            | 14.83%           | 2.67%           |
| CG7269       | 11.00%          | 6.93%           | 19.83%             | 1.28%           | 2.82%               | 5.73%           | 3.64%           | 8.56%            | 27.72%           | 12.50%          |
| CG7437       | 42.60%          | 10.72%          | 14.54%             | 9.99%           | 3.83%               | 0.39%           | 0.00%           | 1.09%            | 9.45%            | 7.67%           |
| CG7879       | 33.36%          | 7.72%           | 13.39%             | 14.97%          | 5.51%               | 5.83%           | 1.40%           | 3.54%            | 10.26%           | 4.03%           |
| CG8019       | 31.64%          | 5.52%           | 25.20%             | 12.64%          | 5.58%               | 3.83%           | 0.98%           | 2.33%            | 6.88%            | 5.40%           |
| CG8144       | 14.41%          | 12.98%          | 18.49%             | 8.44%           | 3.86%               | 6.35%           | 4.61%           | 7.06%            | 17.01%           | 6.80%           |
| CG8241       | 11.23%          | 7.16%           | 10.75%             | 9.51%           | 4.48%               | 6.32%           | 3.10%           | 4.89%            | 18.00%           | 24.55%          |
| CG9696       | 25.29%          | 18.50%          | 21.55%             | 13.19%          | 5.40%               | 2.09%           | 1.00%           | 1.93%            | 5.44%            | 5.63%           |
| CG9998       | 29.70%          | 7.97%           | 9.74%              | 18.12%          | 3.04%               | 2.88%           | 0.13%           | 1.57%            | 16.25%           | 10.59%          |
