# Supplementary material
Source: PubMed Central journal article supplement (PMC528766)
Supplement: pnas_101_45_15974__20.pdf [file pnas_101_45_15974__20.pdf]

**Table 13. Quantitation of genes that affect Dscam exon 17 splicing**

| <b>dsRNA</b> | <b>cryptic</b> | <b>17.2</b> | <b>17.1</b> | <b>skipping</b> |
|--------------|----------------|-------------|-------------|-----------------|
| Untreated    | 0.00%          | 9.33%       | 84.78%      | 5.10%           |
| CG10279      | 3.28%          | 25.60%      | 36.64%      | 34.44%          |
| CG11266      | 0.00%          | 46.02%      | 48.87%      | 4.77%           |
| CG12085      | 0.00%          | 48.60%      | 42.56%      | 7.60%           |
| CG1658       | 8.68%          | 32.37%      | 51.34%      | 7.61%           |
| CG4602       | 0.00%          | 43.98%      | 48.88%      | 6.72%           |
| CG5931       | 0.00%          | 49.48%      | 45.36%      | 4.46%           |
| CG6999       | 0.00%          | 46.02%      | 49.53%      | 4.08%           |
| CG7269       | 0.00%          | 31.39%      | 55.22%      | 12.57%          |
