# Supplementary material
Source: PubMed Central journal article supplement (PMC528766)

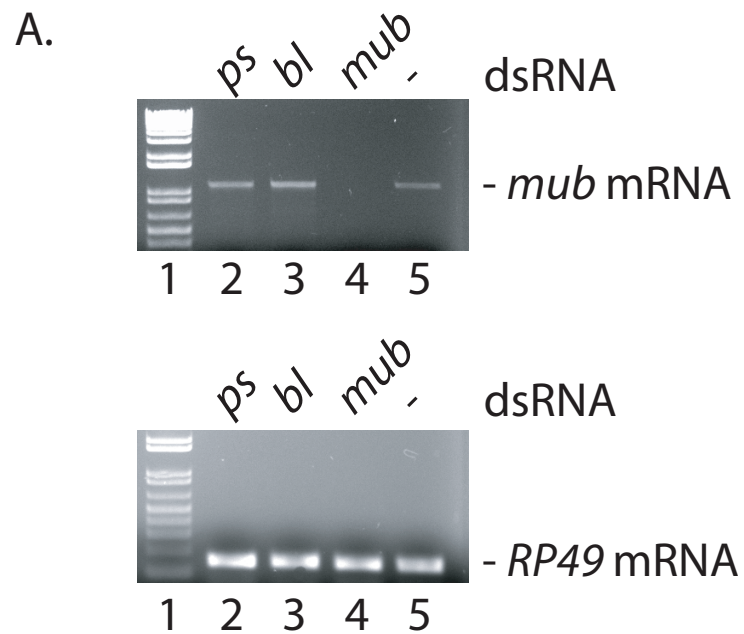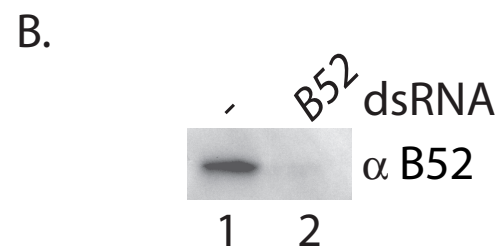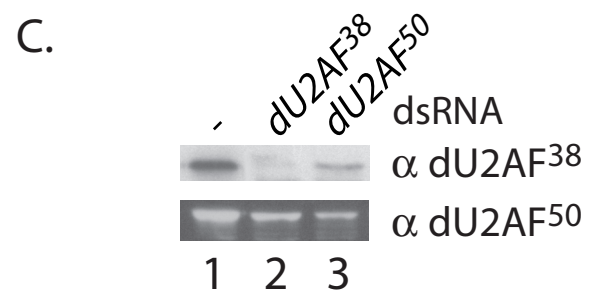

Supplement: pnas_101_45_15974__1.pdf [file pnas_101_45_15974__1.pdf]

*paralytic*

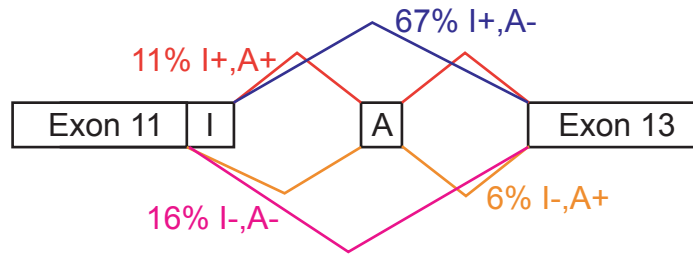

I+, A+  
I+, A-  
I-, A+  
I-, A-

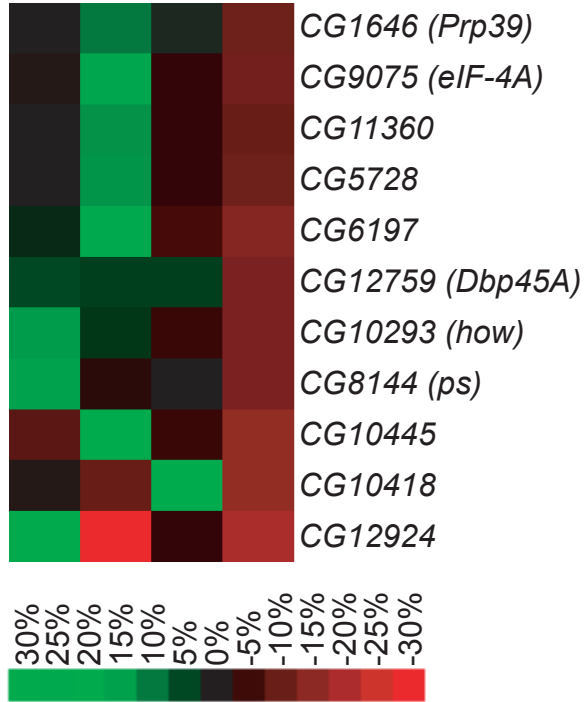

Supplement: pnas_101_45_15974__2.pdf [file pnas_101_45_15974__2.pdf]

A.

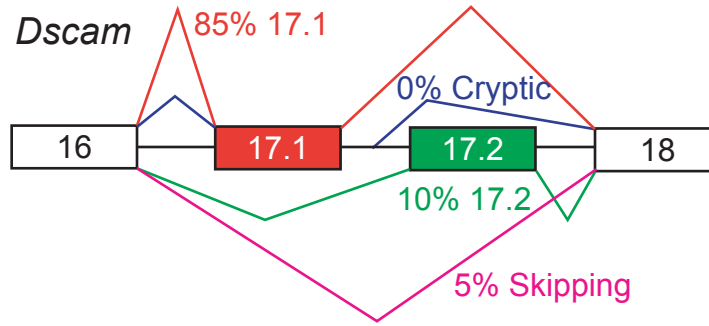

B.

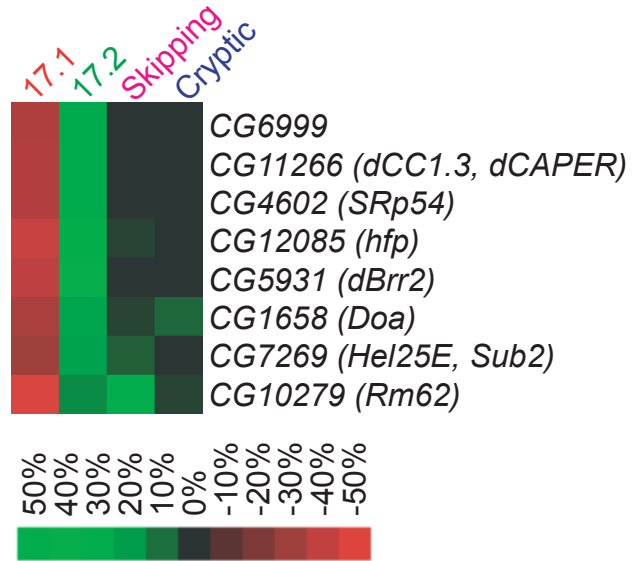

Supplement: pnas_101_45_15974__3.pdf [file pnas_101_45_15974__3.pdf]

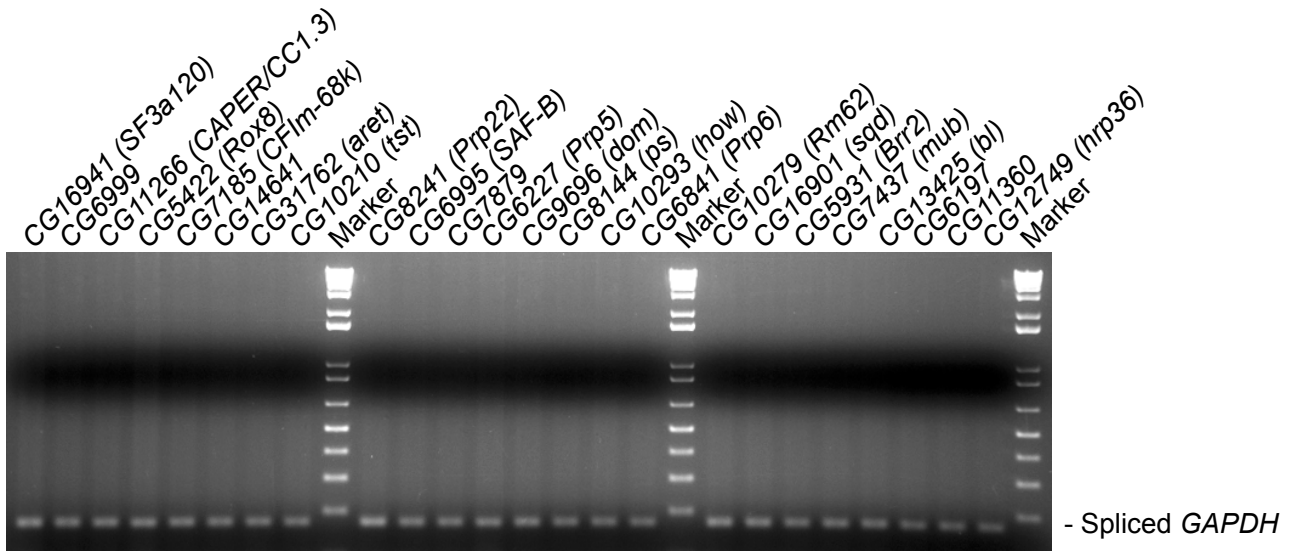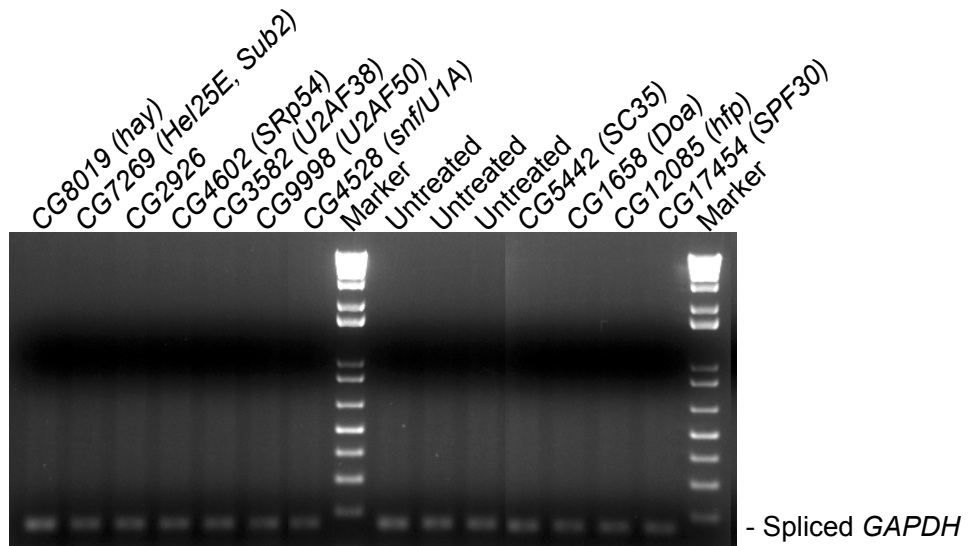

Supplement: pnas_101_45_15974__4.pdf [file pnas_101_45_15974__4.pdf]

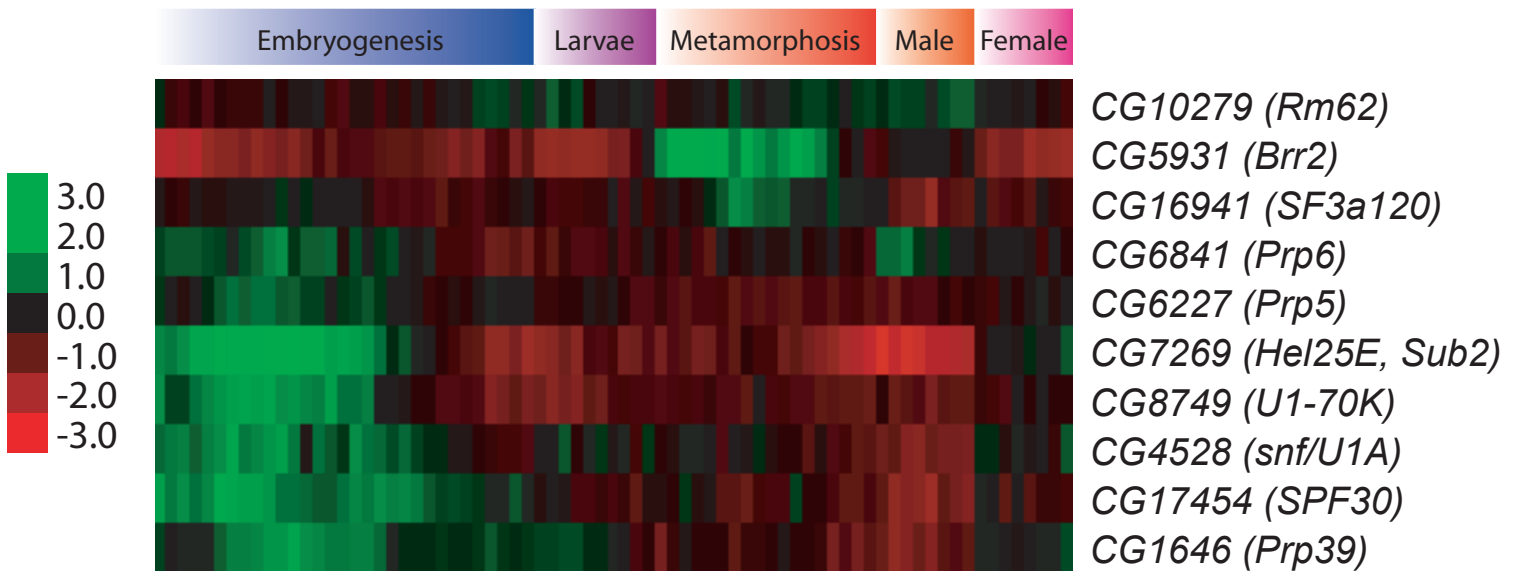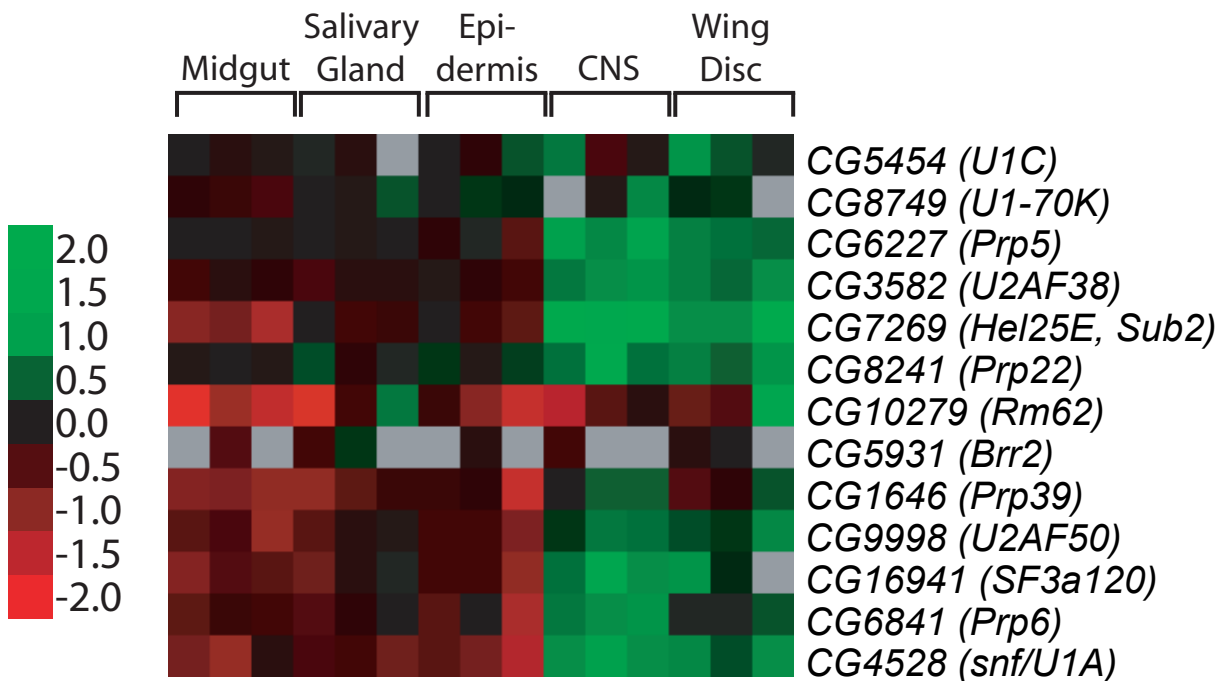

Supplement: pnas_101_45_15974__7.pdf [file pnas_101_45_15974__7.pdf]
